# Supplementary material
Source: PubMed Central journal article supplement (PMC3096730)
Supplement: NIHMS273302-supplement-2.pdf [file NIHMS273302-supplement-2.pdf]

299 patients with stage I-II (pN0)  
colorectal cancer with  
≥1 lymph node available  
(3,093 nodes)

297 patients with pN0 colorectal  
cancer with >1 lymph nodes  
expressing GUCY2C in tumors  
(2,793 lymph nodes)

291 patients with pN0 colorectal  
cancer with >1 lymph nodes  
expressing GUCY2C in tumors with  
RNA of adequate integrity  
(2,774 lymph nodes)

- qRT-PCR
- Observation

236 lymph nodes from 76  
patients produced inadequate  
RNA integrity

2 patients with all lymph nodes  
with inadequate RNA integrity

6 patients with primary tumors  
with inadequate GUCY2C  
expression
