# Supplementary material
Source: PubMed Central journal article supplement (PMC3096730)
Supplement: NIHMS273302-supplement-3.pdf [file NIHMS273302-supplement-3.pdf]

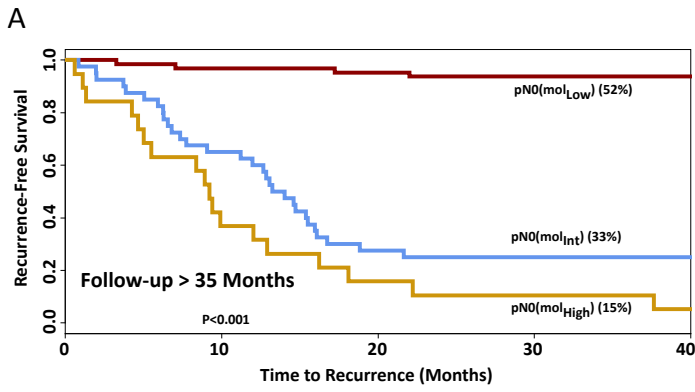

|                           | Months   | 0  | 6  | 12 | 18 | 24 | 30 | 36 |
|---------------------------|----------|----|----|----|----|----|----|----|
| pN0(mol <sub>Low</sub> )  | Patients | 64 | 63 | 62 | 61 | 60 | 60 | 60 |
| Cumulative                | Events   | 0  | 1  | 2  | 3  | 3  | 3  | 3  |
| pN0(mol <sub>Int</sub> )  | Patients | 40 | 33 | 24 | 12 | 10 | 10 | 10 |
| Cumulative                | Events   | 0  | 7  | 16 | 28 | 30 | 30 | 30 |
| pN0(mol <sub>High</sub> ) | Patients | 19 | 12 | 7  | 4  | 2  | 2  | 2  |
| Cumulative                | Events   | 0  | 7  | 12 | 15 | 17 | 17 | 17 |

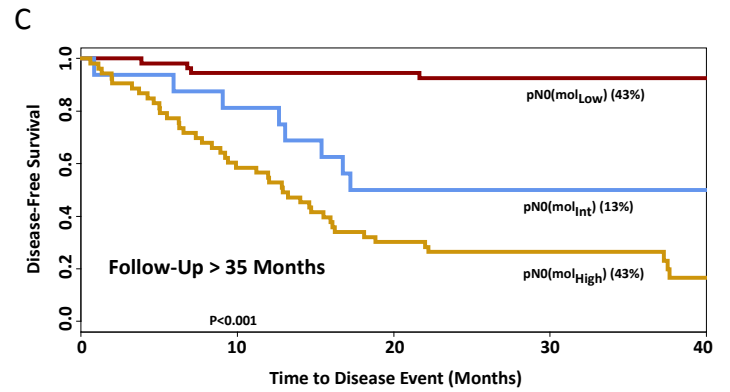

|                           | Months   | 0  | 6  | 12 | 18 | 24 | 30 | 36 |
|---------------------------|----------|----|----|----|----|----|----|----|
| pN0(mol <sub>Low</sub> )  | Patients | 54 | 53 | 51 | 51 | 50 | 50 | 50 |
| Cumulative                | Events   | 0  | 1  | 3  | 3  | 4  | 4  | 4  |
| pN0(mol <sub>Int</sub> )  | Patients | 16 | 14 | 13 | 8  | 8  | 8  | 8  |
| Cumulative                | Events   | 0  | 2  | 3  | 8  | 8  | 8  | 8  |
| pN0(mol <sub>High</sub> ) | Patients | 53 | 41 | 29 | 18 | 14 | 14 | 14 |
| Cumulative                | Events   | 0  | 12 | 24 | 35 | 39 | 39 | 39 |

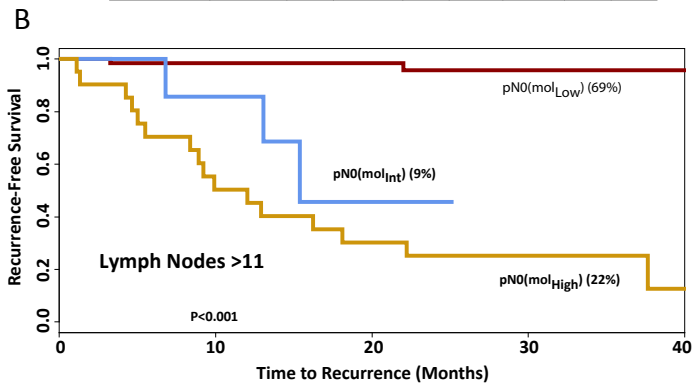

|                           | Months   | 0  | 6  | 12 | 18 | 24 | 30 | 36 |
|---------------------------|----------|----|----|----|----|----|----|----|
| pN0(mol <sub>Low</sub> )  | Patients | 67 | 62 | 55 | 44 | 33 | 19 | 17 |
| Cumulative                | Events   | 0  | 1  | 1  | 1  | 2  | 2  | 2  |
| pN0(mol <sub>Int</sub> )  | Patients | 9  | 6  | 1  | 1  | 1  | 1  | 1  |
| Cumulative                | Events   | 0  | 0  | 1  | 3  | 3  | 3  | 3  |
| pN0(mol <sub>High</sub> ) | Patients | 21 | 14 | 10 | 7  | 5  | 3  | 2  |
| Cumulative                | Events   | 0  | 6  | 10 | 13 | 15 | 15 | 15 |

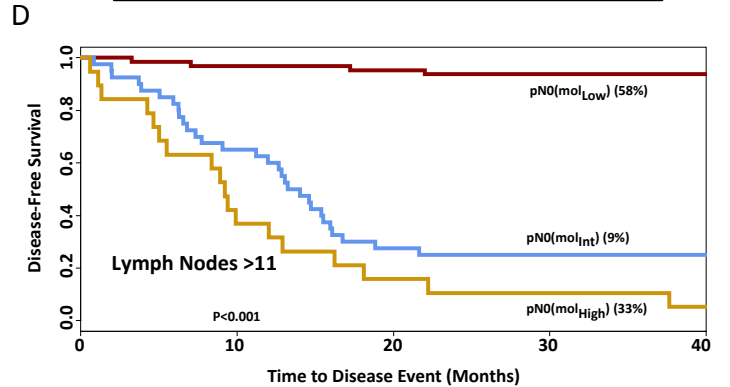

|                           | Months   | 0  | 6  | 12 | 18 | 24 | 30 | 36 |
|---------------------------|----------|----|----|----|----|----|----|----|
| pN0(mol <sub>Low</sub> )  | Patients | 56 | 55 | 47 | 36 | 27 | 15 | 14 |
| Cumulative                | Events   | 0  | 0  | 1  | 1  | 1  | 2  | 2  |
| pN0(mol <sub>Int</sub> )  | Patients | 9  | 8  | 7  | 3  | 2  | 2  | 2  |
| Cumulative                | Events   | 0  | 0  | 0  | 2  | 3  | 3  | 3  |
| pN0(mol <sub>High</sub> ) | Patients | 32 | 22 | 17 | 13 | 10 | 7  | 5  |
| Cumulative                | Events   | 0  | 9  | 13 | 17 | 20 | 20 | 20 |
