# Supplementary material
Source: PubMed Central journal article supplement (PMC3096730)

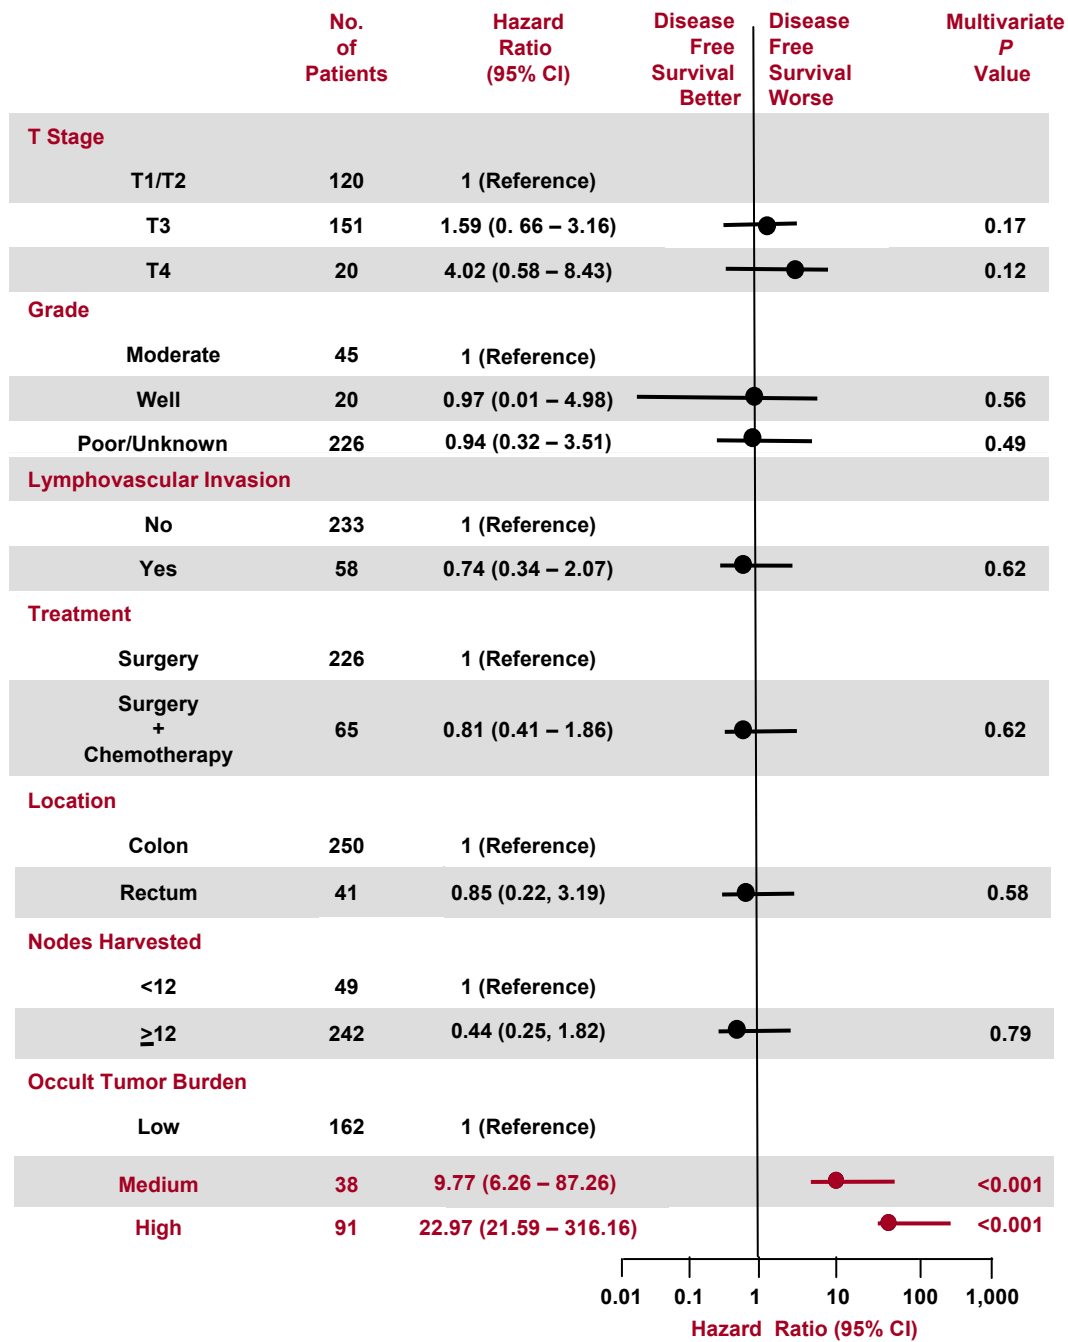

Supplement: NIHMS273302-supplement-4.pdf [file NIHMS273302-supplement-4.pdf]
